# Supplementary material
Source: PubMed Central journal article supplement (PMC7340705)
Supplement: 12264_2020_485_MOESM1_ESM.pdf [file 12264_2020_485_MOESM1_ESM.pdf]

**Table S1.** Frequency of CCG alleles in normal individuals and HD patients of different geographical origins

| CCG repeat size | HD patients     |                      |                      | Normal individuals |                       |                      |
|-----------------|-----------------|----------------------|----------------------|--------------------|-----------------------|----------------------|
|                 | Chinese (n=200) | Japanese (n=58) [14] | European (n=178) [2] | Chinese (n=496)    | Japanese (n=185) [14] | European (n=479) [2] |
| 7               | 54.5%           | 15.5%                | 94.4%                | 54.5%              | 62.2%                 | 67.8%                |
| 10              | 41.0%           | 84.5%                | 5.6%                 | 37.7%              | 37.3%                 | 27.1%                |
